# Supplementary material for: Dispensing Processes Impact Apparent Biological Activity as Determined by Computational and Statistical Analyses
Source: PubMed Central journal article supplement (PMC3641061; doi:10.1371/journal.pone.0062325), 2013-05-01
Supplement: pone.0062325.s003.pdf [file pone.0062325.s003.pdf]

| #  | Structure | MW      | logP | H bond donors | H bond acceptors | SMILES                                                                           | Molar refractivity (40-130) | Polar surface area <140 Å <sup>2</sup> | LogD, pH 7 | IC50 Echo = A | IC50 Tecan = B | log echo | log tecan | B/A      | Charge at pH 7 | pI    |
|----|-----------|---------|------|---------------|------------------|----------------------------------------------------------------------------------|-----------------------------|----------------------------------------|------------|---------------|----------------|----------|-----------|----------|----------------|-------|
| 10 |           | 426.86  | 4.29 | 2             | 9                | <chem>C1C=CC=C2OCOC2=C1NC1=CC=NC(NC2=NC(=CC=C2)N2CCOCC2)=N1</chem>               | 112.5                       | 93.66                                  | 4.23       | 0.064         | 0.817          | -1.19382 | -0.08778  | 12.76563 | 0.12           | 8.23  |
| 11 |           | 526.975 | 4.38 | 1             | 12               | <chem>CN(C1=CC=NC(NC2=NC(=CC(=N2)N2CCOCC2)N2CCOCC2)=N1)C1=C2OCOC2=CC=C1Cl</chem> | 139.57                      | 110.23                                 | 4.01       | 0.486         | 3.03           | -0.31336 | 0.481443  | 6.234568 | 0.36           | 7.5   |
| 4  |           | 402.45  | 3.02 | 2             | 9                | <chem>CN(C1=CC=NC(NC2=CC=NC(=C2)N2CCOCC2)=N1)C1=CC=CC2=C1C=NN2</chem>            | 116.53                      | 95.09                                  | 1.73       | 0.003         | 0.146          | -2.52288 | -0.83565  | 48.66667 | 0.98           | 10.69 |
| 5  |           | 487.56  | 3.5  | 2             | 11               | <chem>CN(C1=CC=NC(NC2=CC(=NC(=C2)N2CCOCC2)N2CCOCC2)=N1)C1=CC=CC2=C1C=NN2</chem>  | 140.34                      | 107.56                                 | 1.6        | 0.002         | 0.553          | -2.69897 | -0.25727  | 276.5    | 1              | 11.19 |
| 6  |           | 436.9   | 4.21 | 2             | 9                | <chem>CN(C1=CC=NC(NC2=NC(=CC(Cl)=C2)N2CCOCC2)=N1)C1=CC=CC2=C1C=NN2</chem>        | 121.64                      | 95.09                                  | 4.21       | 0.007         | 0.973          | -2.1549  | -0.01189  | 139      | 1.01           | 9.86  |
| 7  |           | 488.54  | 3.47 | 2             | 12               | <chem>CN(C1=CC=NC(NC2=NC(=NC(=C2)N2CCOCC2)N2CCOCC2)=N1)C1=CC=CC2=C1C=NN2</chem>  | 139.11                      | 120.45                                 | 3.47       | 0.003         | 0.778          | -2.52288 | -0.10902  | 259.3333 | 0.01           | 7.42  |

|     |  |        |      |   |    |                                                                               |        |       |      |         |       |          |          |          |      |      |
|-----|--|--------|------|---|----|-------------------------------------------------------------------------------|--------|-------|------|---------|-------|----------|----------|----------|------|------|
| 8   |  | 436.9  | 3.84 | 2 | 9  | <chem>CN(C1=CC=NC(NC2=CC(=NC(Cl)=C2)N2CCOCC2)=N1)C1=CC=CC2=C1C=NN2</chem>     | 122.39 | 95.09 | 3.83 | 0.004   | 0.445 | -2.39794 | -0.35164 | 111.25   | 0.01 | 8.75 |
| 9   |  | 426.86 | 3.59 | 2 | 9  | <chem>ClC1=CC=C2OCOC2=C1NC1=CC=NC(NC2=NC=CC(=C2)N2CCOCC2)=N1</chem>           | 112.19 | 93.66 | 2.57 | 0.052   | 0.17  | -1.284   | -0.76955 | 3.269231 | 0.96 | 9.27 |
| W1  |  | 477.56 | 3.42 | 1 | 10 | <chem>COC1=CC(=NC=C1)N(C)C1=NC(NC2=CC(=CC(=C2)N2CCOCC2)N2CCOCC2)=NC=C1</chem> | 136.48 | 88.11 | 3.34 | 0.01362 | 0.112 | -1.86582 | -0.95078 | 8.223201 | 0.36 | 9.99 |
| W11 |  | 461.56 | 3.71 | 1 | 9  | <chem>CN(C1=NC(C)=CC=C1)C1=NC(NC2=CC(=CC(=C2)N2CCOCC2)N2CCOCC2)=NC=C1</chem>  | 134.61 | 78.88 | 3.69 | 0.207   | >14.4 | -0.68403 | #VALUE!  | >69.565  | 0.05 | 9.67 |
| W12 |  | 461.56 | 4.1  | 1 | 9  | <chem>CN(C1=NC=C(C)C=C1)C1=NC(NC2=CC(=CC(=C2)N2CCOCC2)N2CCOCC2)=NC=C1</chem>  | 135.05 | 78.88 | 4.08 | 0.158   | 0.25  | -0.80134 | -0.60206 | 1.582278 | 0.02 | 9.52 |
| W3  |  | 481.98 | 3.59 | 1 | 9  | <chem>CN(C1=CC(Cl)=CN=C1)C1=NC(NC2=CC(=CC(=C2)N2CCOCC2)N2CCOCC2)=NC=C1</chem> | 134.5  | 78.88 | 3.59 | 0.01164 | 0.049 | -1.93405 | -1.3098  | 4.209622 | 0.01 | 9.36 |

|        |                                                                                     |         |      |   |    |                                                                               |        |       |      |         |       |          |          |          |      |       |
|--------|-------------------------------------------------------------------------------------|---------|------|---|----|-------------------------------------------------------------------------------|--------|-------|------|---------|-------|----------|----------|----------|------|-------|
| W5     | 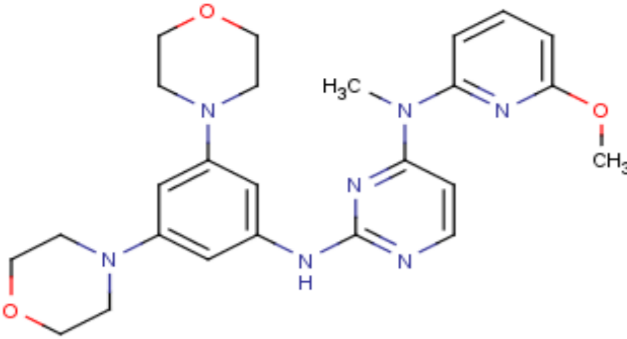   | 477.56  | 4.02 | 1 | 10 | <chem>COC1=CC=CC(=N1)N(C)C1=NC(NC2=CC(=CC(=C2)N2CCOCC2)N2CCOCC2)=NC=C1</chem> | 136.79 | 88.11 | 4.02 | 0.00633 | 0.087 | -2.1986  | -1.06048 | 13.74408 | 0.01 | 9.21  |
| W7b    |    | 477.56  | 2.83 | 1 | 10 | <chem>COC1=CC(=CN=C1)N(C)C1=NC(NC2=CC(=CC(=C2)N2CCOCC2)N2CCOCC2)=NC=C1</chem> | 136.16 | 88.11 | 2.82 | 0.00358 | 0.152 | -2.44612 | -0.81816 | 42.4581  | 0.01 | 9.42  |
| W081   |    | 467.299 | 5.78 | 1 | 7  |                                                                               | 116.87 | 66.41 | 5.77 |         | 38.3  |          | 1.583199 |          | 1.01 | 9.85  |
| W082.1 |  | 517.959 | 5.07 | 1 | 9  |                                                                               | 135.56 | 78.88 | 3.17 |         | 1.12  |          | 0.049218 |          | 1.01 | 11.22 |
| W082.2 |  | 517.959 | 5.07 | 1 | 9  |                                                                               | 135.56 | 78.88 | 3.26 |         | 0.808 |          | -0.09259 |          | 1    | 9.8   |
| W082.3 |  | 467.299 | 5.41 | 1 | 7  |                                                                               | 117.61 | 66.41 | 5.4  |         | 1.78  |          | 0.25042  |          | 0.02 | 8.83  |

|        |                                                                                     |         |      |   |    |  |        |       |      |  |       |  |          |  |      |       |
|--------|-------------------------------------------------------------------------------------|---------|------|---|----|--|--------|-------|------|--|-------|--|----------|--|------|-------|
| WO82.4 | 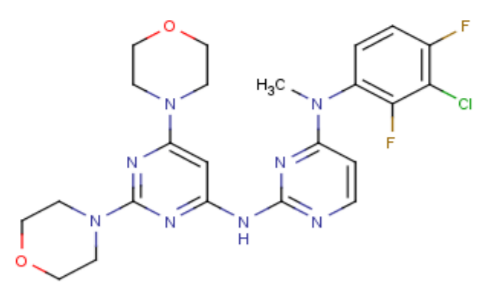   | 518.947 | 5.04 | 1 | 10 |  | 134.33 | 91.77 | 5.03 |  | 6.27  |  | 0.797268 |  | 0.01 | 7.4   |
| WO83   |    | 440.926 | 4.64 | 2 | 8  |  | 123.49 | 86.64 | 4.63 |  | 0.198 |  | -0.70333 |  | 1.01 | 9.86  |
| WO84.1 |    | 491.585 | 3.92 | 2 | 10 |  | 142.18 | 99.11 | 2.03 |  | 0.297 |  | -0.52724 |  | 1    | 11.22 |
| WO84.2 |  | 491.585 | 3.92 | 2 | 10 |  | 142.18 | 99.11 | 2.11 |  | 0.456 |  | -0.34104 |  | 1    | 9.8   |
| WO84.3 |  | 440.296 | 4.26 | 2 | 8  |  | 124.23 | 86.64 | 4.26 |  | 0.473 |  | -0.32514 |  | 0.02 | 8.77  |
| WO84.4 |  | 492.573 | 3.9  | 2 | 11 |  | 140.95 | 112   | 3.89 |  | 0.374 |  | -0.42713 |  | 0.01 | 7.42  |

|        |                                                                                   |         |      |   |    |  |        |       |      |         |  |          |  |  |      |       |
|--------|-----------------------------------------------------------------------------------|---------|------|---|----|--|--------|-------|------|---------|--|----------|--|--|------|-------|
| WO85.1 | 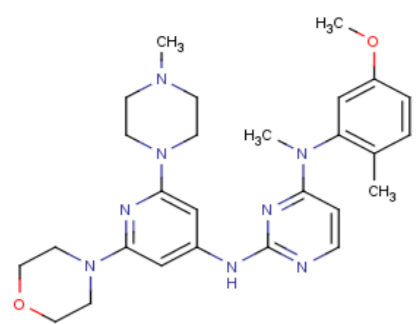 | 504.627 | 4.6  | 1 | 10 |  | 148.81 | 82.12 | 2.37 | 0.00231 |  | -2.63639 |  |  | 1.74 | 10.88 |
| WO85.2 |  | 505.612 | 4.07 | 2 | 10 |  | 146.48 | 99.11 | 2.17 | 0.00325 |  | -2.48812 |  |  | 1    | 11.24 |

Legend:

Simple numbers (e.g., 10) refer to compounds in US Patent 7,718,653, "Pyrimidine derivatives for inhibiting Eph receptors" (Barlaam, Ducray, & Kettle – AstraZeneca, Sodertalje, Sweden)

Numbers beginning with W (e.g., W7b) refer to compounds in WO 2009/010794 A1, "2,4-DIAMINO-PYRIMIDINE DERIVATIVES" (Barlaam & Ducray – AstraZeneca, Sodertalje, Sweden)

Numbers beginning with WO8 (e.g., WO82.1) refer to compounds in WO 2008/132505 A1 "N' - (PHENYL) -N- (MORPHOLIN-4-YL-PYRIDIN-2-YL) -PYRIMIDINE-2, 4-DIAMINE DERIVATIVES AS EPHB4 KINASE INHIBITORS FOR THE TREATMENT OF PROLIFERATIVE CONDITIONS" (Barlaam & Ducray – AstraZeneca, Sodertalje, Sweden)
